# Supplementary material for: Accelerometery as a measure of modifiable physical activity in high-risk elderly preoperative patients: a prospective observational pilot study
Source: PubMed Central journal article supplement — BMJ Open. 2019 Nov 3;9(11):e032346. doi: 10.1136/bmjopen-2019-032346 (PMC6858105; doi:10.1136/bmjopen-2019-032346), 2019-11-03
Supplement: bmjopen-2019-032346.draft_revisions.pdf [file bmjopen-2019-032346.draft_revisions.pdf]

# BMJ Open

BMJ Open is committed to open peer review. As part of this commitment we make the peer review history of every article we publish publicly available.

When an article is published we post the peer reviewers' comments and the authors' responses online. We also post the versions of the paper that were used during peer review. These are the versions that the peer review comments apply to.

The versions of the paper that follow are the versions that were submitted during the peer review process. They are not the versions of record or the final published versions. They should not be cited or distributed as the published version of this manuscript.

BMJ Open is an open access journal and the full, final, typeset and author-corrected version of record of the manuscript is available on our site with no access controls, subscription charges or pay-per-view fees (<http://bmjopen.bmj.com>).

If you have any questions on BMJ Open's open peer review process please email [info.bmjopen@bmj.com](mailto:info.bmjopen@bmj.com)

# BMJ Open

## Accelerometry as a measure of modifiable physical activity in high risk elderly preoperative patients, a prospective observational pilot study.

|                               |                                                                                                                                                                                                                                                                                                                                                                                                |
|-------------------------------|------------------------------------------------------------------------------------------------------------------------------------------------------------------------------------------------------------------------------------------------------------------------------------------------------------------------------------------------------------------------------------------------|
| Journal:                      | <i>BMJ Open</i>                                                                                                                                                                                                                                                                                                                                                                                |
| Manuscript ID                 | bmjopen-2019-032346                                                                                                                                                                                                                                                                                                                                                                            |
| Article Type:                 | Research                                                                                                                                                                                                                                                                                                                                                                                       |
| Date Submitted by the Author: | 15-Jun-2019                                                                                                                                                                                                                                                                                                                                                                                    |
| Complete List of Authors:     | Grimes, Lisa; Cambridge University Hospitals NHS Foundation Trust, University Division of Anaesthesia<br>Outtrim, Joanne; Cambridge University Hospitals NHS Foundation Trust, University Division of Anaesthesia<br>Griffin, Simon; The Primary Care Unit, Institute of Public Health<br>Ercole, Ari; Cambridge University Hospitals NHS Foundation Trust, University Division of Anaesthesia |
| Keywords:                     | Adult anaesthesia < ANAESTHETICS, SURGERY, Elderly, Perioperative medicine, physical activity, wearable technology                                                                                                                                                                                                                                                                             |
|                               |                                                                                                                                                                                                                                                                                                                                                                                                |

SCHOLARONE™  
Manuscripts

1  
2  
3  
4  
5 **Accelerometry as a measure of modifiable physical activity in high risk elderly preoperative**  
6 **patients, a prospective observational pilot study.**  
7  
8

9 Lisa Grimes,<sup>1</sup> Joanne Outtrim,<sup>2</sup> Simon J Griffin<sup>3</sup> and Ari Ercole<sup>4</sup>

11 <sup>1</sup>Division of Anaesthesia, University of Cambridge, Addenbrooke's Hospital, Cambridge, UK

13 <sup>2</sup>Division of Anaesthesia, University of Cambridge, Addenbrooke's Hospital, Cambridge, UK

15 <sup>3</sup>Primary Care Unit, University of Cambridge, Institute of Public Health, Cambridge, UK

17 <sup>4</sup>Division of Anaesthesia, University of Cambridge, Addenbrooke's Hospital, Cambridge, UK  
18  
19

20 Correspondence to:

21  
22 Dr Ari Ercole  
23 Division of Anaesthesia, University of Cambridge  
24 Addenbrooke's Hospital,  
25 Hills Road,  
26 Cambridge  
27 CB2 0QQ  
28 ae105@cam.ac.uk  
29  
30

31  
32 Word count: 4078  
33

34 Keywords:

35 Perioperative medicine, wearable technology, physical activity, elderly, adult anaesthesia, surgery  
36  
37  
38  
39  
40  
41  
42  
43  
44  
45  
46  
47  
48  
49  
50  
51  
52  
53  
54  
55  
56  
57  
58  
59  
60

**ABSTRACT**

**Objectives:** To use wrist worn accelerometers[1] to establish normative physical activity (PA) and acceptability data for the high-risk elderly preoperative population to facilitate power calculations for future intervention studies, to assess whether PA could be modified by a prehabilitation intervention as part of routine care, to assess any correlation between accelerometer-measured PA and self-reported PA, to assess the acceptability of wearing wrist-worn accelerometers in this population.

**Study Design:** Prospective, observational, pilot study

**Setting:** Single NHS Hospital

**Participants:** Frail patients  $\geq 65$  years awaiting major surgery referred to a multidisciplinary preoperative clinic at which they received a routine intervention aimed at improving their PA. 35 patients were recruited. Average age 79.9 years (SD=5.6).

**Primary outcomes:** Normative PA data measured as a mean daily Euclidean norm minus one (ENMO) in milli-gravitational units(mg).

**Secondary outcomes:** Measure PA levels (mg) following a routine preoperative intervention. Determine correlation between patient reported PA (measured using the Physical Activity Scale for the Elderly[2]) and accelerometer-measured PA (mg). Assess acceptability of wearing a wrist-worn accelerometer measured using visual analogue scale questionnaire and device wear-time (hours).

**Results:** Median baseline daily PA was 14.3mg (IQR 9.75-22.04) with an improvement in PA detected following the intervention [median ENMO post-intervention 20.91mg (IQR 14.83-27.53),  $p=0.022$ ]. There was no significant correlation between accelerometer-measured and self-reported PA [Baseline  $\rho=0.162$  ( $p=0.4$ ), Post intervention  $\rho=-0.144$  ( $p=0.5$ )]. We found high acceptability ratings (Median score of 10/10 on VAS, IQR 8-10) and wear-time compliance [163.2 hours (IQR 150-167.5) pre-intervention and 166.1 hours (IQR 162.5-167) post-intervention].

1  
2  
3 **Conclusions:** Accelerometry is acceptable to this population and increases in PA levels measured  
4 following an unoptimized routine clinical intervention indicates that health behaviour change  
5 interventions may be successful during the preoperative period. Accelerometers may therefore be a  
6  
7  
8  
9  
10 useful tool to design and validate interventions for improving PA in this setting.

11  
12  
13 **Trial registration:** ClinicalTrials.gov (NCT03737903)

## 14 15 16 **ARTICLE SUMMARY**

### 17 18 19 **Strengths and limitations of this study**

- 20  
21 • This is the first study to look at the use of wearable accelerometers to measure and  
22 characterise physical activity in high risk elderly patients in the preoperative period
- 23  
24 • We present a robust and objective method of measuring physical activity levels and compared  
25 this to self-reporting methods of measuring physical activity.
- 26  
27 • We were able to assess the impact of an existing unoptimized preoperative intervention using  
28 accelerometry
- 29  
30 • Limitations of this study include small sample size although this is justified by the fact that it  
31 was an initial pilot study to establish normative physical activity and acceptability data to  
32 facilitate power calculations for further studies.
- 33  
34  
35  
36  
37  
38  
39  
40  
41  
42  
43  
44

## 45 46 47 **INTRODUCTION**

48 The “high risk” surgical population is characterised by advanced age, frailty and multiple comorbidities  
49 particularly when undergoing major surgery. This population accounts for just 12.5% of surgical  
50 procedures, but over 80% of perioperative deaths in the UK[3]. With an aging population, increasing  
51 numbers of high-risk patients require surgery. It is therefore important to improve understanding of  
52 risk factors for perioperative complications in order to facilitate shared decision making and  
53 appropriate planning of perioperative care.  
54  
55  
56  
57  
58  
59  
60

1  
2  
3 Frail patients are less able to recover from the physiological stress encountered during the  
4 perioperative period and frailty status is an independent predictor of postoperative morbidity and  
5 mortality[4,5]. Physical inactivity is a defining feature of frailty. Older adults spend a significant part  
6 of their day being sedentary[6] and do not meet current PA recommendations[7,8]. Increased PA can  
7 delay the onset of frailty and slow the progression from a non-frail to a frail state[9] and exercise  
8 interventions can reverse the functional decline associated with acute hospitalisation of elderly  
9 patients[10]. There is also growing evidence for the association between PA and perioperative  
10 outcomes[11]. Prehabilitation programmes typically incorporate optimisation of PA alongside  
11 medical, nutritional and psychological status. Prescribed exercise training programmes have specific  
12 goals of muscle strengthening and increased physical fitness but are labour intensive and most have  
13 suboptimal participant adherence rates[12]. The optimum frequency, intensity, timing and type of  
14 exercise-prehabilitation intervention is uncertain, nor is it clear that prehabilitation reduces  
15 postoperative morbidity and mortality[13]. Furthermore, prehabilitation-potential may vary  
16 depending upon the surgical population of interest, and knowledge of this is important for targeting  
17 of specific interventions.

18  
19 Sustained changes in habitual, environmentally-cued health behaviours are notoriously difficult to  
20 achieve[14], but it is plausible that the preoperative period, due to the well-defined target end-point  
21 (surgery), may represent a unique teachable moment during which motivation to convert intention  
22 into action may be elevated, and a sustained change in behaviour may be more achievable than other  
23 settings. Thus, it may be possible to influence patient behaviours in order to reduce perioperative risk  
24 and improve outcomes.

25  
26 In order to develop and evaluate pre-operative interventions to promote PA it is critical to first have  
27 a robust, precise method of measuring PA, and normative physical activity data for the population of  
28 interest. Traditionally, in the perioperative setting, patients' PA levels have been evaluated using brief  
29 self-report questionnaires, however these are prone to error and recall bias[15], particularly for low-

1  
2  
3 intensity PA typically seen in an elderly cohort. The gold standard method of direct observation is  
4 labour-intensive and time-consuming, and therefore not feasible for widespread use[16].  
5  
6 Accelerometers could offer a potential solution; Tri-axial accelerometers detect magnitude and  
7  
8 direction of acceleration and have been used in large-scale epidemiological studies to provide a valid  
9  
10 estimate of overall PA[17]. They are unobtrusive and non-invasive and can be worn on locations such  
11  
12 as around the wrist or clipped onto a hip belt to measure PA in free-living environments.  
13  
14 Accelerometers may offer a means to assess the efficacy and therefore optimise interventions to  
15  
16 improve PA. However, this first requires the specific population of interest to be characterised. To our  
17  
18 knowledge wearable accelerometers have not previously been used to characterise PA in a high-risk  
19  
20 elderly population in the pre-operative period. Wrist-worn accelerometers have been shown to be  
21  
22 acceptable and valid measures of PA in volunteers in the 65-79yrs age group[17], but this population  
23  
24 had already been recruited into a large-scale observational study involving intense phenotyping, and  
25  
26 it is likely that the high-risk preoperative elderly group is distinct in its activity behaviour due to  
27  
28 comorbidities and underlying diagnoses. Furthermore, the acceptability of PA measurement has not  
29  
30 been established in these patients and they are likely to be distinct from non-surgical controls. In order  
31  
32 to design and optimise future interventions it is first vital to understand baseline PA in this group.  
33  
34  
35 Through this pilot study we aimed to characterise PA levels across a variety of surgical specialties in  
36  
37 order to obtain normative data to establish power calculations for future intervention studies. We  
38  
39 also sought to assess whether there was a change in PA following current preoperative interventions  
40  
41 (which form part of usual care in our centre) and quantify the variability of that change. We set out to  
42  
43 quantify the correlation between objectively measured and self-reported PA in this patient group.  
44  
45 Finally, as accelerometers have not previously been used in this setting we aimed to assess how  
46  
47 acceptable it is to use wrist-worn accelerometers to measure PA in high risk elderly patients in the  
48  
49 preoperative period prior to rolling them out into a larger scale programme of research.  
50  
51  
52  
53  
54  
55  
56  
57  
58  
59  
60

## METHODS

### Study approvals and population

This study was conducted at Cambridge University Hospitals NHS Foundation Trust and approval by a Research Ethics Committee was obtained prior to participant recruitment (Research ethics number: 18/SC/0287). Written informed consent was obtained from all participants. Inclusion criteria were patients referred to the Perioperative Review Informing Management of Elderly patients (PRIME) clinic (a multidisciplinary clinic specifically designed to optimise frail elderly patients pre-operatively), participants must have had capacity to consent and complete activity questionnaires and be willing and able to wear the accelerometer around their wrist. PRIME referral criteria were patients listed for major or complex surgery who were aged  $\geq 65$  years and either had a Rockwood Clinical Frailty Scale[18] score (CFS) of  $\geq 4$  or had a clinical picture that gave the pre-assessment nurse enough concern to refer for a multidisciplinary preoperative assessment. Referral to, and attendance at the PRIME clinic formed part of usual preoperative care at our institution. Participants were excluded from the study if they did not meet the inclusion criteria, they refused to participate or their PRIME clinic appointment was scheduled  $<72$  hours after referral for recruitment, as previous research has shown a minimum period of 72 hours of continuous accelerometer wear-time is required to produce valid data[17]. Recruitment took place between July and December 2018.

### Patient and Public involvement

Patient and public involvement (PPI) was sought during the study design process with the aim of ensuring that the research question was agreed to be important, the methods and running of the study were likely to be acceptable to patients and the documents were written appropriately for the target study population. Study documents including patient information leaflets, consent forms and information posters were circulated to Cambridge University Hospital PPI panel for review. Feedback from the PPI panel allowed us to construct more lay-friendly documents. The PPI panel considered the



1  
2  
3 burden of intervention and time required to participate in research. We will consider further PPI  
4 involvement in order to disseminate the study results to those participants who requested to be  
5 informed.  
6  
7  
8  
9

### 10 11 12 **Accelerometer and data collection** 13

14  
15 Participants wore a waterproof triaxial accelerometer (Axivity AX3, Newcastle, UK[1]) around their  
16 wrist for 24 hours per day, for seven days prior to their PRIME clinic visit, and seven days immediately  
17 after their PRIME clinic visit. Participants wore the device around their preferred wrist for convenience  
18 and to maximise compliance. Participants were instructed by the research team how to re-fit the  
19 accelerometer should they remove it for any reason. Accelerometer devices were programmed to  
20 commence data collection on the same day that the device was fitted and to record for seven days.  
21 The accelerometer measures acceleration in three axes sampled at 100Hz with a dynamic range of +/-  
22 8g.  
23  
24  
25  
26  
27  
28  
29  
30  
31  
32  
33  
34  
35

36 The PRIME clinic visit involves a preoperative review by an anaesthetist, geriatrician, physiotherapist  
37 and occupational therapist. During this clinic visit, patients were provided with a behaviour change  
38 intervention as part of usual perioperative care at our institution (see behaviour change intervention  
39 below). At the PRIME clinic visit, a member of the research team retrieved the accelerometer worn by  
40 participants for the initial seven-day period and provided the participant with a new device for the  
41 second seven-day period. Participants completed two questionnaires at the PRIME clinic visit: a  
42 validated self-reported activity questionnaire; Physical Activity Scale for the Elderly (PASE)[2], and a  
43 locally designed acceptability questionnaire (see assessment of acceptability below). Participants  
44 were asked to repeat the PASE questionnaire at the end of the second seven-day wear period and  
45 return the accelerometer and completed PASE questionnaire back to the study centre in a prepaid  
46 envelope.  
47  
48  
49  
50  
51  
52  
53  
54  
55  
56  
57  
58  
59  
60

### **Assessment of acceptability**

Overall acceptability was assessed using a participant completed questionnaire utilising a visual analogue scale (VAS) from 0-10, 0 being “very unacceptable” and 10 being “very acceptable”. We also measured the length of time that the devices were worn in hours (wear time compliance).

### **Behaviour change intervention (PRIME clinic visit)**

The behaviour change intervention (given as part of usual care) consisted of PA and exercise advice described as follows according to the TIDieR checklist[19]. The goals of the intervention were to improve PA levels on a day to day basis through activities of daily living (ADLs) or leisure activities, to improve specific aspects of fitness, perioperative respiratory function and promote independence with personal and domestic ADLs and leisure activities. Verbal and written advice was provided as follows: two generic exercise leaflets (general exercises for the whole body, and walking exercises), bespoke exercise programmes (generated using online Physiotoools[20] software) and local hospital-specific respiratory exercise information leaflets were provided along with advice and information about appropriate community services. The intervention was administered by an NHS Band seven Physiotherapist with a background in Surgery and Elderly rehabilitation and an NHS Band seven Occupational therapist with a background in Surgery, Orthopaedics and Elderly rehabilitation via one face-to-face session (PRIME clinic visit) lasting 40 minutes. The information described above was given to participants in the PRIME clinic room with the expectation that they would undertake the activities in their own homes. The intervention was tailored to each participant, depending upon presentation and planned surgical procedure. Personalised exercise programmes were designed by the Physiotherapist during the clinic visit and taught to participants during this session, with a written information leaflet given to the participant to take home. If participants required adaptive equipment,

1  
2  
3 the Occupational therapist arranged for this to be delivered to the participant's home. Adherence to  
4  
5 this intervention was not otherwise assessed.  
6  
7  
8  
9

### 10 **Data processing and statistical analysis**

11  
12  
13 Raw accelerometry data were downloaded and visually inspected in order to detect any  
14  
15 accelerometer technical issues, to ensure that the accelerometer was worn and recorded for the  
16  
17 correct duration and had recorded the signals as expected. Data analyses were performed in R-  
18  
19 package GGIR, the details of which have been previously described[21].  
20  
21  
22

23 PA related acceleration was calculated using auto-calibrated Euclidian norm minus one (ENMO)[22].  
24  
25 The values presented are the average ENMO for all of the available data normalised per 24-hour cycle  
26  
27 (diurnally balanced), with invalid data imputed using the average at similar time points on different  
28  
29 days of the week. We chose to use ENMO as our measure of PA since previously published cut-offs for  
30  
31 mild/moderate/vigorous intensity PA may not apply to this patient population.  
32  
33  
34

35 We generated descriptive statistics for the number of participants, wear time in hours, and average  
36  
37 daily ENMO milli-gravitational units (mg). We analysed the difference in ENMO before and after the  
38  
39 existing intervention using the Wilcoxon signed rank test. We also analysed ENMO stratified into  
40  
41 orthopaedic and non-orthopaedic surgical populations.  
42  
43  
44

45 Correlation between PA measured objectively using accelerometry, and subjectively using a self-  
46  
47 reported PA questionnaire (PASE) was assessed using Pearson's product moment coefficient, and  
48  
49 Wilcoxon signed rank or rank sum tests were used for comparisons.  
50  
51

52 Statistical analysis was conducted using the R statistical language[23]. Mixed effects models were  
53  
54 constructed using the lme4 package[24], significance testing was done using analysis of deviance. A  
55  
56 statistical significance level of 5% was assumed throughout and no correction for multiple  
57  
58 comparisons were made.  
59  
60

## RESULTS

36 patients were invited to take part in the study, of which 35 participants were recruited, 19 (54%) were female. 20 participants (57%) were listed for orthopaedic surgery, 7 (20%) gastrointestinal surgery, 5 (14%) urological surgery, and 1 each for vascular, gynaecology and breast surgery. The mean age was 79.9 years (SD = 5.6 years). Characteristics of the study population are given in Table 1. Median nurse-assessed Rockwood Clinical Frailty Score (CFS) was 5 (IQR 4-5).

**Table 1.** Characteristics of the study population, Values are mean (SD), number (proportion).

| Characteristics of study sample, (n=35) | Value      |
|-----------------------------------------|------------|
| Age; years                              | 79.9 (5.6) |
| Sex,                                    |            |
| Female                                  | 19 (54%)   |
| Male                                    | 16 (46%)   |
| Rockwood Clinical Frailty Score,        |            |
| 3                                       | 1 (2.9%)   |
| 4                                       | 12 (34.3%) |
| 5                                       | 17 (48.6%) |
| 6                                       | 5 (14.3%)  |
| Surgical specialty,                     |            |
| Orthopaedic                             | 20 (57%)   |
| Gastrointestinal                        | 7 (20%)    |
| Urology                                 | 5 (14%)    |

|             |          |
|-------------|----------|
| Gynaecology | 1 (3%)   |
| Vascular    | 1 (3%)   |
| Breast      | 1 (3%)   |
| ASA score*  |          |
| 2           | 8 (23%)  |
| 3           | 27 (77%) |

\*ASA; American Society of Anaesthesiologists physical status classification system score

Accelerometry data were available for analysis for 34 participants before the intervention and 30 participants after the intervention. Data from one pre-intervention participant were unavailable due to an accelerometer programming error, three participants were withdrawn from the post-intervention part of the study because their surgical procedure was scheduled to be <72hrs after the PRIME clinic visit thus participants would not have been able to wear the device for the minimum required time of 72 hours. One participant was withdrawn from the post-intervention part of the study due to skin irritation around the wrist strap (notably similar irritation was also caused by their own wrist watch), and one participant was withdrawn due to an area of bruising around the wrist strap. This participant was taking oral anticoagulants.

Preoperative baseline PA levels were obtained in 34 participants. The median baseline daily PA level was 14.3mg (IQR 9.75-22.04). There was no significant difference in baseline median PA between males [12.6mg (IQR 9.5-15.7)], and females [16.9mg (IQR 12.5-23.9)],  $p=0.18$ ). Median baseline daily PA in orthopaedic patients was 15.3mg (IQR 10.1-23.5), compared to a median of 12.7mg (IQR 9.2-

1  
2  
3 16.6) in non-orthopaedic patients ( $p=0.271$ ) as shown in Figure 1. Baseline PA was higher in females  
4 than males in this orthopaedic sub-group (22.84mg vs 10.17mg,  $p=0.046$ ).  
5  
6  
7

8 There was a significant increase in overall daily ENMO after the standard clinical intervention [median  
9 baseline ENMO 14.3mg (IQR 9.75-22.04), median ENMO post-intervention 20.91mg (IQR 14.83-  
10 27.53),  $p=0.022$ ] as shown in Figure 1. There was no significant difference in ENMO before and after  
11 the intervention in patients awaiting orthopaedic surgery [median baseline ENMO 15.29mg (IQR  
12 10.07-23.5), median ENMO post-intervention 20.05mg (IQR 14.83-27.61),  $p=0.304$ ]. However, in  
13 those participants listed for non-orthopaedic surgery there was a significant increase in mean PA  
14 following the intervention [median baseline ENMO 12.71mg (IQR 9.20-16.61), median ENMO post-  
15 intervention 21.49mg (IQR 18.04-25.82),  $p=0.019$ ] Figure 1.  
16  
17  
18  
19  
20  
21  
22  
23  
24  
25  
26  
27  
28  
29  
30  
31  
32

33 The distribution of PA over time for all patients is shown in Figure 2 for both pre- and post-  
34 intervention. There was evidence for a linear increase (mixed effects model) in PA over time in the  
35 pre-intervention group +0.28 mg/day, (95%CI: 0.011-0.53,  $p=0.04$ ) with a similar finding in the post  
36 intervention group +0.15 mg/day (95% CI: -0.19-+0.50,  $p=0.37$ ), albeit not achieving statistical  
37 significance. There was no evidence for a significant effect of whether the day was a weekend or not,  
38 nor was there evidence for a non-linear time dependency.  
39  
40  
41  
42  
43  
44  
45  
46

47 There was no significant difference in self-reported PASE scores before and after the PRIME clinic  
48 intervention [median PASE pre-intervention was 67 (IQR 31-89.75), median PASE post-intervention  
49 was 65 (IQR 45.5-101)  $p=0.247$ ]. Furthermore, no significant correlation was found between the  
50 accelerometer-measured PA and the self-reported PA measured using the PASE questionnaire, either  
51 before or after the intervention [Baseline  $\rho=0.162$  ( $p=0.4$ ), Post intervention  $\rho= -0.144$  ( $p=0.5$ )].  
52  
53  
54  
55  
56  
57  
58  
59  
60

1  
2  
3 The median wear time of the wrist-worn accelerometer was 163.2 hours (IQR 150-167.5) pre-  
4 intervention and 166.1 hours (IQR 162.5-167) post-intervention. On average participants wore the  
5 accelerometers for 98% of the measurement period indicating excellent wear-time compliance, with  
6 values comparable to those achieved in other studies[17]. 33 participants completed the acceptability  
7 questionnaire, and the median overall acceptability score obtained was 10 (IQR 8-10). The high wear-  
8 time compliance, low voluntary withdrawal rate and high acceptability scores indicate overall  
9 acceptability and feasibility of measuring PA in high risk elderly patients in the preoperative period  
10 using these accelerometers.  
11  
12  
13  
14  
15  
16  
17  
18  
19  
20  
21  
22  
23

## 24 **DISCUSSION**

25  
26  
27 These data demonstrate that wrist worn accelerometers can successfully be used to measure PA in  
28 high-risk elderly patients in the preoperative period, and that this process was acceptable to  
29 participants. The fact that there was no correlation between participant-reported PASE and  
30 accelerometer-measured PA highlights the need for more objective measures of PA[25] and suggests  
31 a role for such devices in perioperative research and perhaps clinical care. We demonstrated a  
32 substantial variability in baseline PA in the frail elderly preoperative population. Our study also gives  
33 an estimate of the typical mean daily PA levels in this specific group of patients which has not  
34 previously been described. Such data should inform the planning of potential studies involving PA  
35 measurements in this setting. We found low PA levels in this population: By way of comparison, the  
36 UK Biobank study reported mean daily ENMO values in over three thousand 75-79 year olds (the most  
37 comparable group to ours) women of 23.9mg (SD=6.5) and in men this was 22.9mg (SD=6.8)[17]. Our  
38 study population had lower baseline mean daily ENMO of 18.9mg (SD=10.5) in women, and 13.71mg  
39 (SD=6.1) in men, which may reflect their underlying medical conditions, frailty and increased age  
40 (mean age of our study population was 79.9 years SD 5.6). Further work is be needed to develop  
41  
42  
43  
44  
45  
46  
47  
48  
49  
50  
51  
52  
53  
54  
55  
56  
57  
58  
59  
60

1  
2  
3 metabolically meaningful PA intensity cut-points in this patient group but we suggest from our work  
4  
5 that ENMO summary data is a useful surrogate even without this.  
6  
7  
8  
9

10 In the non-orthopaedic subgroup we found a significant increase in PA following the PRIME clinic  
11  
12 intervention, even though this was not optimised. Mixed effects modelling did not show any decrease  
13  
14 in PA over time in either the pre- or post-intervention group suggesting that PA levels were sustained  
15  
16 at least for the duration of the measurement period. Because we had no control on which day of the  
17  
18 week participants would be recruited from clinic, we also looked at whether activity might be different  
19  
20 on weekend days, but this did not seem to be the case in this population. The PA levels in some  
21  
22 patients post-intervention resembled more closely the baseline levels reported in the Biobank study.  
23  
24 The fact that the unoptimised intervention was successful is a remarkable and somewhat unexpected  
25  
26 finding as health behaviour change is notoriously difficult to achieve[14]. Our findings provide some  
27  
28 evidence to suggest that the preoperative setting may indeed represent a unique period during which  
29  
30 behavioural interventions are more likely to be successful, perhaps due to the well defined end-point  
31  
32 (surgical procedure) and the motivation that physical activity may impact perioperative outcome. It  
33  
34 seems reasonable to suggest that a well-designed complex intervention could result in greater  
35  
36 changes in PA.  
37  
38  
39  
40  
41  
42  
43

44 The lack of significant improvement in PA in those participants awaiting orthopaedic surgery may  
45  
46 indicate a restriction of PA in this population, in which mobility is likely to be limited due to underlying  
47  
48 orthopaedic problems (all orthopaedic participants were awaiting major lower limb joint  
49  
50 replacements). The potential to increase preoperative PA in the orthopaedic population may be  
51  
52 limited; waiting lists for joint replacement surgery in the UK are long, and such patients may have  
53  
54 already been in the hospital system prior to the PRIME clinic visit (intervention). This potentially  
55  
56 restricted PA, and prior engagement with hospital services may mean that these patients may have  
57  
58 already received PA advice from their surgical and primary care teams prior to referral to the PRIME  
59  
60



1  
2  
3 clinic and may have already reached their prehabilitation limit. Nevertheless, although PA in this  
4  
5 subgroup group did not change following the existing unoptimized intervention, there is perhaps still  
6  
7 scope for a better intervention, and wearable accelerometers may assist in determining what this may  
8  
9 be. Our finding provides support for the idea that a complex intervention would need to be tailored  
10  
11 to this population.  
12  
13

14  
15  
16 We asked participants to wear the accelerometers around their wrist. Traditionally the hip has been  
17  
18 the most widely used site for placement of the accelerometer as this was believed to best represent  
19  
20 total body movement[26]. However, wear-time compliance has been a problem with hip-worn devices  
21  
22 which limits the validity of the data analysis[27]. Cui et al[28] fixed an accelerometer to participants'  
23  
24 chests using an adhesive plaster, however one quarter of participants did not wear the device for 72  
25  
26 hours which may limit the validity of data. We opted for a wrist worn device to circumvent this issue,  
27  
28 and asked participants to wear the device continuously (day and night) for a seven-day period to  
29  
30 simplify proceedings. We also felt that this placement would capture PA associated with activities of  
31  
32 daily living, likely to form a significant proportion of PA amongst a high-risk elderly population. Whilst  
33  
34 previous studies have utilised the non-dominant wrist[17], for this pilot study we allowed a pragmatic  
35  
36 approach to allow participants to select their preferred wrist in order to maximise compliance and  
37  
38 total wear time. Furthermore, previous work has shown no difference in PA measurements when  
39  
40 measured simultaneously on the dominant and non-dominant wrist[29]. We accept that in a frail  
41  
42 elderly population, many of whom use walking aids, a wrist-worn device must be used with caution  
43  
44 and further work is warranted to evaluate the transferability of data from different sites.  
45  
46  
47  
48  
49  
50

51  
52 Limitations of this study include the small sample size. Within this small sample we were non-selective  
53  
54 regarding recruitment of participants from various surgical specialties. As such, we were unable to  
55  
56 further analyse data from subgroups other than orthopaedics versus non-orthopaedics. This is an area  
57  
58 of potential future research incorporating larger patient numbers in various subspecialties. One  
59  
60

1  
2  
3 further limitation was that we did not attempt to characterise the types of PA performed although  
4 this would in principle be possible if 'signatures' of different activities were obtained.  
5  
6  
7  
8  
9

10 Whilst we have demonstrated that patients' behaviour can change in the preoperative period, we do  
11 not know how this translates clinically, and indeed what degree (if any) of change in PA might lead to  
12 a change in the outcomes that are important to patients. However, it is reasonable to propose that  
13 such a relationship might exist, and further work is needed to investigate whether increasing PA levels  
14 in the preoperative period has any impact on perioperative outcome, and if so, whether the response  
15 is dose- or timing-dependent. Furthermore, if an association between preoperative PA and  
16 perioperative outcome is discovered, it is important to determine the minimum duration of increased  
17 PA levels required to influence patient outcome, and whether this would be feasible in the  
18 preoperative period. If optimum PA level targets can be determined it would then be important to  
19 find out whether it is actually possible to meet PA 'targets' in the high-risk elderly population by use  
20 of preoperative interventions. Further research into the optimum prehabilitation programme for frail  
21 elderly patients in various patient cohorts is also required. Whilst we have demonstrated that the  
22 increase in PA after the intervention was sustained throughout the seven-day measurement period,  
23 we do not know whether the increase in PA is sustained beyond this period. Further work is required  
24 to elucidate this.  
25  
26  
27  
28  
29  
30  
31  
32  
33  
34  
35  
36  
37  
38  
39  
40  
41  
42  
43  
44

## 45 **CONCLUSION**

46  
47 Using wrist-worn accelerometers to characterise daily typical activity levels and assess the impact of  
48 an existing clinical intervention was feasible and acceptable in this patient population. An increase in  
49 PA levels was measured following an unoptimized, and this increase in PA was sustained for at least a  
50 week suggesting that the preoperative period may be a teachable moment in which health behaviour  
51 change interventions may be successful. Patient reported PA did not correlate with our objective  
52  
53  
54  
55  
56  
57  
58  
59  
60

1  
2  
3 measurements. Accelerometers may therefore be a useful tool to design and validate interventions  
4  
5 for improving PA in this setting.  
6  
7  
8  
9

### 10 **ACKNOWLEDGEMENTS**

11  
12 This study was registered with ClinicalTrials.gov (NCT03737903) on 01/07/18. The authors would like  
13  
14 to acknowledge the help of the Nursing staff of the Preoperative Assessment Clinic at Cambridge  
15  
16 University Hospitals NHS Foundation Trust, Dr Christopher Hall and Dr Mark Vivian for their assistance  
17  
18 with participant recruitment, and Ms Amanda Saunders and Ms Sarah Lester for assistance with  
19  
20 retrieval and distribution of accelerometers in the PRIME clinic visit.  
21  
22  
23  
24  
25  
26  
27

### 28 **COMPETING INTERESTS AND FUNDING**

29  
30 This research received no specific grant from any funding agency in the public, commercial or non-for-  
31  
32 profit sectors. No competing interests declared.  
33  
34  
35  
36  
37  
38

### 39 **DATA SHARING**

40  
41 The authors are happy to consider requests for sharing fully anonymised data for specific research  
42  
43 proposals on a collaborative basis.  
44  
45  
46  
47  
48  
49

### 50 **AUTHOR CONTRIBUTORS**

51  
52 LG, AE and SG contributed to the conception and design of the study, LG and AE wrote the protocol,  
53  
54 LG and JO contributed to data collection. LG and AE were responsible for data analysis. LG and AE  
55  
56 prepared the manuscript and all authors contributed to the review and revision of the manuscript and  
57  
58 provided final approval of the version to be published.  
59  
60

1  
2  
3  
4  
5  
6  
7  
8  
9  
10  
11  
12  
13  
14  
15  
16  
17  
18  
19  
20  
21  
22  
23  
24  
25  
26  
27  
28  
29  
30  
31  
32  
33  
34  
35  
36  
37  
38  
39  
40  
41  
42  
43  
44  
45  
46  
47  
48  
49  
50  
51  
52  
53  
54  
55  
56  
57  
58  
59  
60

For peer review only

## REFERENCES

- 1 Axivity. AX3\_Data\_Sheet (1). 2015. [https://axivity.com/files/resources/AX3\\_Data\\_Sheet.pdf](https://axivity.com/files/resources/AX3_Data_Sheet.pdf) (accessed 12/06/2019)
- 2 Washburn R, Smith K. The physical activity scale for the elderly (PASE): development and evaluation. *J Clin Epidemiol* 1993;**46**:153–62. doi:10.1016/0895-4356(93)90053-4
- 3 Pearse RM, Harrison DA, James P, *et al*. Identification and characterisation of the high-risk surgical population in the United Kingdom. *Crit Care* 2006;**10**. doi:10.1186/cc4928
- 4 Makary MA, Segev DL, Pronovost PJ, *et al*. Frailty as a Predictor of Surgical Outcomes in Older Patients. *J Am Coll Surg* 2010;**210**:901–8. doi:10.1016/j.jamcollsurg.2010.01.028
- 5 Louwers L, Schnickel G, Rubinfeld I. Use of a simplified frailty index to predict Clavien 4 complications and mortality after hepatectomy: analysis of the National Surgical Quality Improvement Project database. *Am J Surg* 2016;**211**:1071–6. doi:10.1016/j.amjsurg.2015.09.015
- 6 Harvey JA, Chastin SFM, Skelton DA. Prevalence of sedentary behavior in older adults: A systematic review. *Int J Environ Res Public Health* 2013;**10**:6645–61. doi:10.3390/ijerph10126645
- 7 Taylor D. Physical activity is medicine for older adults. *Postgrad Med J*. 2014 Jan;**90**(1059)26-32. doi:10.1136/postgradmedj-2012-131366
- 8 British Heart Foundation. Physical inactivity across the Four Nations. *Phys Inact Sedentary Behav Rep 2017* 2017.
- 9 Rogers NT, Marshall A, Roberts CH, *et al*. Physical activity and trajectories of frailty among older adults: Evidence from the English Longitudinal Study of Ageing. *PLoS One*. 2017 Feb 2;**12**(2). doi:10.1371/journal.pone.0170878

- 1  
2  
3 10 Martínez-Velilla N, Casas-Herrero A, Zambom-Ferraresi F, *et al.* Effect of Exercise Intervention  
4 on Functional Decline in Very Elderly Patients during Acute Hospitalization: A Randomized  
5 Clinical Trial. *JAMA Intern Med* 2018;**179**:28–36. doi:10.1001/jamainternmed.2018.4869  
6  
7  
8  
9  
10  
11 11 Nilsson H, Angerås U, Bock D, *et al.* Is preoperative physical activity related to post-surgery  
12 recovery? A cohort study of patients with breast cancer. *BMJ Open* 2016;**6**:e007997.  
13 doi:10.1136/bmjopen-2015-007997  
14  
15  
16  
17  
18 12 Picorelli AMA, Pereira LSM, Pereira DS, *et al.* Adherence to exercise programs for older  
19 people is influenced by program characteristics and personal factors: a systematic review. *J*  
20 *Physiother* 2014;**60**:151–6. doi:10.1016/J.JPHYS.2014.06.012  
21  
22  
23  
24  
25 13 Milder DA, Pillinger NL, Kam PCA. The role of prehabilitation in frail surgical patients: A  
26 systematic review. *Acta Anaesthesiol Scand* 2018;**62**:1356–66. doi:10.1111/aas.13239  
27  
28  
29  
30 14 Middleton KR, Anton SD, Perri MG. Long-Term Adherence to Health Behavior Change HHS  
31 Public Access. *Am J Lifestyle Med* 2013;**7**:395–404. doi:10.1177/1559827613488867  
32  
33  
34  
35 15 Bond DS, Jakicic JM, Unick JL, *et al.* Pre- to postoperative physical activity changes in bariatric  
36 surgery patients: self report vs. objective measures. *Obesity (Silver Spring)* 2010;**18**:2395–7.  
37 doi:10.1038/oby.2010.88  
38  
39  
40  
41  
42  
43 16 Vanhees L, Lefevre J, Philippaerts R, *et al.* How to assess physical activity? How to assess  
44 physical fitness? *Eur J Cardiovasc Prev Rehabil.* 2005 Apr;**12**(2):102-14.  
45 doi:10.1097/01.hjr.0000161551.73095.9c  
46  
47  
48  
49  
50 17 Doherty A, Jackson D, Hammerla N, *et al.* Large scale population assessment of physical  
51 activity using wrist worn accelerometers: The UK biobank study. *PLoS One* 2017;**12**:1–14.  
52 doi:10.1371/journal.pone.0169649  
53  
54  
55  
56  
57 18 Rockwood K, Song X, MacKnight C, *et al.* A global clinical measure of fitness and frailty in  
58 elderly people. *Can Med Assoc J* 2005;**173**:489–95. doi:10.1503/cmaj.050051  
59  
60

- 1  
2  
3 19 Hoffmann TC, Glasziou PP, Boutron I, *et al*. Better reporting of interventions: template for  
4 intervention description and replication (TIDieR) checklist and guide. *BMJ* 2014;**348**:g1687.  
5  
6 doi:10.1136/bmj.g1687  
7  
8  
9  
10  
11 20 PhysioTools Key Features | Physiotoools. [https://www.physiotools.com/physiotools-key-](https://www.physiotools.com/physiotools-key-features)  
12 features (accessed 24 Feb 2019).  
13  
14  
15 21 Van Hees VT, Fang Z, Zhao JH, *et al*. GGIR: Raw Accelerometer Data Analysis. *R Packag version*  
16 *18-1* Published Online First: 2019. doi:10.5281/zenodo.1051064  
17  
18  
19  
20  
21 22 van Hees VT, Fang Z, Langford J, *et al*. Autocalibration of accelerometer data for free-living  
22 physical activity assessment using local gravity and temperature: an evaluation on four  
23 continents. *J Appl Physiol* 2014;**117**:738–44. doi:10.1152/jappphysiol.00421.2014  
24  
25  
26  
27  
28 23 Team RC. R: A language and environment for statistical computing. 2017. [https://www.R-](https://www.R-project.org/)  
29 project.org/ (accessed 12/6/19)  
30  
31  
32  
33 24 Bates D, Mächler M, Bolker B, *et al*. Fitting Linear Mixed-Effects Models Using **lme4**. *J Stat*  
34 *Softw* 2015;**67**:1–48. doi:10.18637/jss.v067.i01  
35  
36  
37  
38 25 Wareham NJ, Rennie KL. The assessment of physical activity in individuals and populations:  
39 why try to be more precise about how physical activity is assessed? *Int J Obes Relat Metab*  
40 *Disord* 1998;**22 Suppl 2**:S30-8.  
41  
42  
43  
44  
45 26 Cleland I, Kikhia B, Nugent C, *et al*. Optimal placement of accelerometers for the detection of  
46 everyday activities. *Sensors (Basel)* 2013;**13**:9183–200. doi:10.3390/s130709183  
47  
48  
49  
50  
51 27 Troiano RP, McClain JJ, Brychta RJ, *et al*. Evolution of accelerometer methods for physical  
52 activity research. *Br J Sports Med*. 2014 Jul;**48**(13):1019-23. doi:10.1136/bjsports-2014-  
53 093546  
54  
55  
56  
57  
58 28 Cui HW, Kirby GS, Surmacz K, *et al*. The association of pre-operative home accelerometry  
59  
60

with cardiopulmonary exercise variables. *Anaesthesia* Published Online First: 2017.

doi:10.1111/anae.14181

- 29 Dieu O, Mikulovic J, Fardy PS, *et al.* Physical activity using wrist-worn accelerometers: comparison of dominant and non-dominant wrist. *Clin Physiol Funct Imaging* 2017;**37**:525–9.  
doi:10.1111/cpf.12337

## LEGENDS

**Figure 1.** Notched Box Plots representing physical activity (ENMO, milli-gravitational units mg) before (□) and after (■) the PRIME clinic intervention in all participants (left), participants listed for orthopaedic surgery (middle) and non-orthopaedic surgery (right). Open circle (o) represents outliers. The notch represents the 95% confidence interval of the Median; 95% Confidence that the medians differ if two boxes' notches do not overlap.

**Figure 2.** Physical activity (ENMO) against time before (left panel) and after (right panel) the intervention for each patient. The dots / blue lines represent the mean across the patient group with +/- 1 s.d. shaded. Only complete (2-6) days included. Mean physical activity is increased after the intervention with no discernible decline in activity over time.



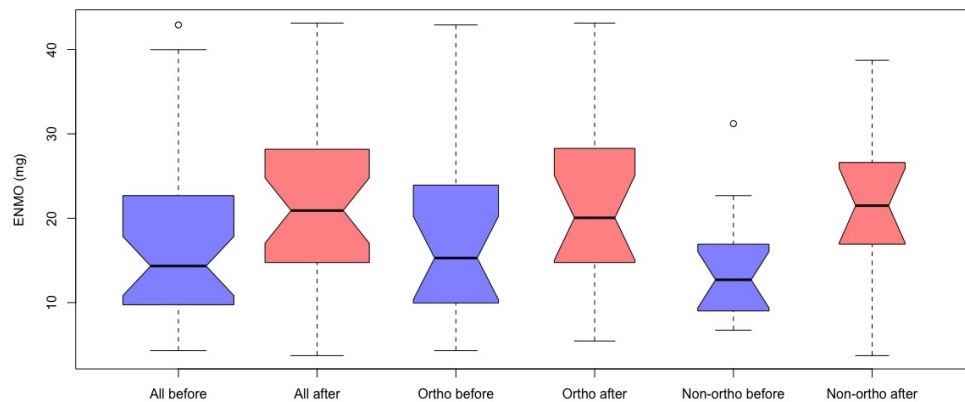

Notched Box Plots representing physical activity (ENMO, milli-gravitational units mg) before ( ) and after ( ) the PRIME clinic intervention in all participants (left), participants listed for orthopaedic surgery (middle) and non-orthopaedic surgery (right). Open circle (o) represents outliers. The notch represents the 95% confidence interval of the Median; 95% Confidence that the medians differ if two boxes' notches do not overlap.

416x211mm (72 x 72 DPI)

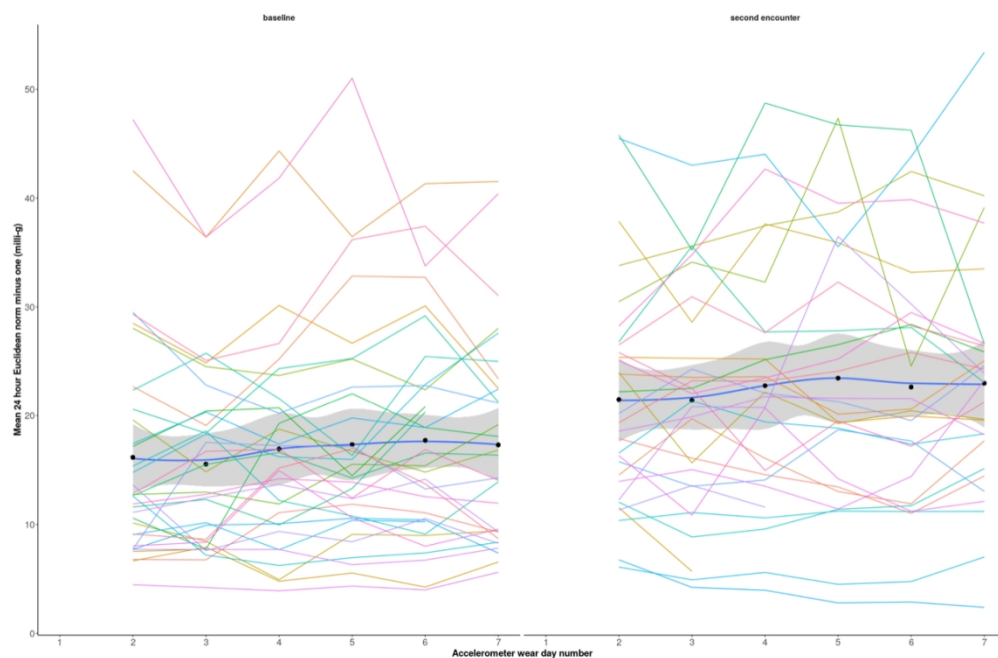

Figure 2. Physical activity (ENMO) against time before (left panel) and after (right panel) the intervention for each patient. The dots / blue lines represent the mean across the patient group with  $\pm 1$  s.d. shaded. Only complete (2-6) days included. Mean physical activity is increased after the intervention with no discernible decline in activity over time

# BMJ Open

## Accelerometry as a measure of modifiable physical activity in high risk elderly preoperative patients, a prospective observational pilot study.

|                                 |                                                                                                                                                                                                                                                                                                                                                                                                |
|---------------------------------|------------------------------------------------------------------------------------------------------------------------------------------------------------------------------------------------------------------------------------------------------------------------------------------------------------------------------------------------------------------------------------------------|
| Journal:                        | <i>BMJ Open</i>                                                                                                                                                                                                                                                                                                                                                                                |
| Manuscript ID                   | bmjopen-2019-032346.R1                                                                                                                                                                                                                                                                                                                                                                         |
| Article Type:                   | Original research                                                                                                                                                                                                                                                                                                                                                                              |
| Date Submitted by the Author:   | 17-Sep-2019                                                                                                                                                                                                                                                                                                                                                                                    |
| Complete List of Authors:       | Grimes, Lisa; Cambridge University Hospitals NHS Foundation Trust, University Division of Anaesthesia<br>Outtrim, Joanne; Cambridge University Hospitals NHS Foundation Trust, University Division of Anaesthesia<br>Griffin, Simon; The Primary Care Unit, Institute of Public Health<br>Ercole, Ari; Cambridge University Hospitals NHS Foundation Trust, University Division of Anaesthesia |
| <b>Primary Subject Heading</b>: | Anaesthesia                                                                                                                                                                                                                                                                                                                                                                                    |
| Secondary Subject Heading:      | Anaesthesia, Geriatric medicine, Surgery                                                                                                                                                                                                                                                                                                                                                       |
| Keywords:                       | Adult anaesthesia < ANAESTHETICS, SURGERY, Elderly, Perioperative medicine, physical activity, wearable technology                                                                                                                                                                                                                                                                             |
|                                 |                                                                                                                                                                                                                                                                                                                                                                                                |

SCHOLARONE™  
Manuscripts

1  
2  
3  
4  
5 **Accelerometry as a measure of modifiable physical activity in high risk elderly preoperative**  
6 **patients, a prospective observational pilot study.**  
7  
8

9 Lisa Grimes,<sup>1</sup> Joanne Outtrim,<sup>2</sup> Simon J Griffin<sup>3</sup> and Ari Ercole<sup>4</sup>

11 <sup>1</sup>Division of Anaesthesia, University of Cambridge, Addenbrooke's Hospital, Cambridge, UK

13 <sup>2</sup>Division of Anaesthesia, University of Cambridge, Addenbrooke's Hospital, Cambridge, UK

15 <sup>3</sup>Primary Care Unit, University of Cambridge, Institute of Public Health, Cambridge, UK

17 <sup>4</sup>Division of Anaesthesia, University of Cambridge, Addenbrooke's Hospital, Cambridge, UK  
18  
19

20 Correspondence to:

21  
22 Dr Ari Ercole  
23 Division of Anaesthesia, University of Cambridge  
24 Addenbrooke's Hospital,  
25 Hills Road,  
26 Cambridge  
27 CB2 0QQ  
28 ae105@cam.ac.uk  
29  
30

31  
32 Word count: 4148  
33

34 Keywords:

35 Perioperative medicine, wearable technology, physical activity, elderly, adult anaesthesia, surgery  
36  
37  
38  
39  
40  
41  
42  
43  
44  
45  
46  
47  
48  
49  
50  
51  
52  
53  
54  
55  
56  
57  
58  
59  
60

**ABSTRACT**

**Objectives:** To use wrist-worn accelerometers (Axivity AX3) to establish normative physical activity (PA) and acceptability data for the high-risk elderly preoperative population, to assess whether PA could be modified by a prehabilitation intervention as part of routine care, to assess any correlation between accelerometer-measured PA and self-reported PA, to assess the acceptability of wearing wrist-worn accelerometers in this population.

**Study Design:** Prospective, observational, pilot study

**Setting:** Single National Health Service Hospital

**Participants:** Frail patients  $\geq 65$  years awaiting major surgery referred to a multidisciplinary preoperative clinic at which they received a routine intervention aimed at improving their PA. 35 patients were recruited. Average age 79.9 years (SD=5.6).

**Primary outcomes:** Normative PA data measured as a mean daily Euclidean norm minus one (ENMO) in milli-gravitational units(mg).

**Secondary outcomes:** Measure PA levels (mg) following a routine preoperative intervention. Determine correlation between patient reported PA (measured using the Physical Activity Scale for the Elderly) and accelerometer-measured PA (mg). Assess acceptability of wearing a wrist-worn accelerometer measured using visual analogue scale questionnaire and device wear-time (hours).

**Results:** Median baseline daily PA was 14.3mg (IQR 9.75-22.04) with an improvement in PA detected following the intervention [median ENMO post-intervention 20.91mg (IQR 14.83-27.53),  $p=0.022$ ]. There was no significant correlation between accelerometer-measured and self-reported PA [Baseline  $\rho=0.162$  ( $p=0.4$ ), Post intervention  $\rho=-0.144$  ( $p=0.5$ )]. We found high acceptability ratings (Median score of 10/10 on VAS, IQR 8-10) and wear-time compliance [163.2 hours (IQR 150-167.5) pre-intervention and 166.1 hours (IQR 162.5-167) post-intervention].

1  
2  
3 **Conclusions:** Accelerometry is acceptable to this population and increases in PA levels measured  
4 following an unoptimized routine clinical intervention indicates that health behaviour change  
5 interventions may be successful during the preoperative period. Accelerometers may therefore be a  
6  
7  
8  
9  
10 useful tool to design and validate interventions for improving PA in this setting.

11  
12  
13 **Trial registration:** ClinicalTrials.gov (NCT03737903)  
14

## 15 **ARTICLE SUMMARY**

### 16 **Strengths and limitations of this study**

- 17  
18  
19 • This is the first study to look at the use of wearable accelerometers to measure and  
20  
21  
22  
23  
24  
25  
26  
27  
28  
29  
30  
31  
32  
33  
34  
35  
36  
37  
38  
39  
40  
41  
42  
43  
44  
45  
46  
47  
48  
49  
50  
51  
52  
53  
54  
55  
56  
57  
58  
59  
60  
61  
62  
63  
64  
65  
66  
67  
68  
69  
70  
71  
72  
73  
74  
75  
76  
77  
78  
79  
80  
81  
82  
83  
84  
85  
86  
87  
88  
89  
90  
91  
92  
93  
94  
95  
96  
97  
98  
99  
100  
101  
102  
103  
104  
105  
106  
107  
108  
109  
110  
111  
112  
113  
114  
115  
116  
117  
118  
119  
120  
121  
122  
123  
124  
125  
126  
127  
128  
129  
130  
131  
132  
133  
134  
135  
136  
137  
138  
139  
140  
141  
142  
143  
144  
145  
146  
147  
148  
149  
150  
151  
152  
153  
154  
155  
156  
157  
158  
159  
160  
161  
162  
163  
164  
165  
166  
167  
168  
169  
170  
171  
172  
173  
174  
175  
176  
177  
178  
179  
180  
181  
182  
183  
184  
185  
186  
187  
188  
189  
190  
191  
192  
193  
194  
195  
196  
197  
198  
199  
200  
201  
202  
203  
204  
205  
206  
207  
208  
209  
210  
211  
212  
213  
214  
215  
216  
217  
218  
219  
220  
221  
222  
223  
224  
225  
226  
227  
228  
229  
230  
231  
232  
233  
234  
235  
236  
237  
238  
239  
240  
241  
242  
243  
244  
245  
246  
247  
248  
249  
250  
251  
252  
253  
254  
255  
256  
257  
258  
259  
260  
261  
262  
263  
264  
265  
266  
267  
268  
269  
270  
271  
272  
273  
274  
275  
276  
277  
278  
279  
280  
281  
282  
283  
284  
285  
286  
287  
288  
289  
290  
291  
292  
293  
294  
295  
296  
297  
298  
299  
300  
301  
302  
303  
304  
305  
306  
307  
308  
309  
310  
311  
312  
313  
314  
315  
316  
317  
318  
319  
320  
321  
322  
323  
324  
325  
326  
327  
328  
329  
330  
331  
332  
333  
334  
335  
336  
337  
338  
339  
340  
341  
342  
343  
344  
345  
346  
347  
348  
349  
350  
351  
352  
353  
354  
355  
356  
357  
358  
359  
360  
361  
362  
363  
364  
365  
366  
367  
368  
369  
370  
371  
372  
373  
374  
375  
376  
377  
378  
379  
380  
381  
382  
383  
384  
385  
386  
387  
388  
389  
390  
391  
392  
393  
394  
395  
396  
397  
398  
399  
400  
401  
402  
403  
404  
405  
406  
407  
408  
409  
410  
411  
412  
413  
414  
415  
416  
417  
418  
419  
420  
421  
422  
423  
424  
425  
426  
427  
428  
429  
430  
431  
432  
433  
434  
435  
436  
437  
438  
439  
440  
441  
442  
443  
444  
445  
446  
447  
448  
449  
450  
451  
452  
453  
454  
455  
456  
457  
458  
459  
460  
461  
462  
463  
464  
465  
466  
467  
468  
469  
470  
471  
472  
473  
474  
475  
476  
477  
478  
479  
480  
481  
482  
483  
484  
485  
486  
487  
488  
489  
490  
491  
492  
493  
494  
495  
496  
497  
498  
499  
500  
501  
502  
503  
504  
505  
506  
507  
508  
509  
510  
511  
512  
513  
514  
515  
516  
517  
518  
519  
520  
521  
522  
523  
524  
525  
526  
527  
528  
529  
530  
531  
532  
533  
534  
535  
536  
537  
538  
539  
540  
541  
542  
543  
544  
545  
546  
547  
548  
549  
550  
551  
552  
553  
554  
555  
556  
557  
558  
559  
560  
561  
562  
563  
564  
565  
566  
567  
568  
569  
570  
571  
572  
573  
574  
575  
576  
577  
578  
579  
580  
581  
582  
583  
584  
585  
586  
587  
588  
589  
590  
591  
592  
593  
594  
595  
596  
597  
598  
599  
600  
601  
602  
603  
604  
605  
606  
607  
608  
609  
610  
611  
612  
613  
614  
615  
616  
617  
618  
619  
620  
621  
622  
623  
624  
625  
626  
627  
628  
629  
630  
631  
632  
633  
634  
635  
636  
637  
638  
639  
640  
641  
642  
643  
644  
645  
646  
647  
648  
649  
650  
651  
652  
653  
654  
655  
656  
657  
658  
659  
660  
661  
662  
663  
664  
665  
666  
667  
668  
669  
670  
671  
672  
673  
674  
675  
676  
677  
678  
679  
680  
681  
682  
683  
684  
685  
686  
687  
688  
689  
690  
691  
692  
693  
694  
695  
696  
697  
698  
699  
700  
701  
702  
703  
704  
705  
706  
707  
708  
709  
710  
711  
712  
713  
714  
715  
716  
717  
718  
719  
720  
721  
722  
723  
724  
725  
726  
727  
728  
729  
730  
731  
732  
733  
734  
735  
736  
737  
738  
739  
740  
741  
742  
743  
744  
745  
746  
747  
748  
749  
750  
751  
752  
753  
754  
755  
756  
757  
758  
759  
760  
761  
762  
763  
764  
765  
766  
767  
768  
769  
770  
771  
772  
773  
774  
775  
776  
777  
778  
779  
780  
781  
782  
783  
784  
785  
786  
787  
788  
789  
790  
791  
792  
793  
794  
795  
796  
797  
798  
799  
800  
801  
802  
803  
804  
805  
806  
807  
808  
809  
810  
811  
812  
813  
814  
815  
816  
817  
818  
819  
820  
821  
822  
823  
824  
825  
826  
827  
828  
829  
830  
831  
832  
833  
834  
835  
836  
837  
838  
839  
840  
841  
842  
843  
844  
845  
846  
847  
848  
849  
850  
851  
852  
853  
854  
855  
856  
857  
858  
859  
860  
861  
862  
863  
864  
865  
866  
867  
868  
869  
870  
871  
872  
873  
874  
875  
876  
877  
878  
879  
880  
881  
882  
883  
884  
885  
886  
887  
888  
889  
890  
891  
892  
893  
894  
895  
896  
897  
898  
899  
900  
901  
902  
903  
904  
905  
906  
907  
908  
909  
910  
911  
912  
913  
914  
915  
916  
917  
918  
919  
920  
921  
922  
923  
924  
925  
926  
927  
928  
929  
930  
931  
932  
933  
934  
935  
936  
937  
938  
939  
940  
941  
942  
943  
944  
945  
946  
947  
948  
949  
950  
951  
952  
953  
954  
955  
956  
957  
958  
959  
960  
961  
962  
963  
964  
965  
966  
967  
968  
969  
970  
971  
972  
973  
974  
975  
976  
977  
978  
979  
980  
981  
982  
983  
984  
985  
986  
987  
988  
989  
990  
991  
992  
993  
994  
995  
996  
997  
998  
999  
1000
- We present a robust and objective method of measuring physical activity levels and compared this to self-reporting methods of measuring physical activity.
- We were able to assess the impact of an existing unoptimized preoperative intervention using accelerometry
- Limitations of this study include small sample size although this is justified by the fact that it was an initial pilot study to establish normative physical activity and acceptability data to facilitate power calculations for further studies.

## 45 **INTRODUCTION**

46  
47  
48 The “high risk” surgical population is characterised by advanced age, frailty and multiple comorbidities  
49 particularly when undergoing major surgery. This population accounts for just 12.5% of surgical  
50 procedures, but over 80% of perioperative deaths in the UK[1]. With an aging population, increasing  
51 numbers of high-risk patients require surgery. It is therefore important to improve understanding of  
52 risk factors for perioperative complications in order to facilitate shared decision making and  
53 appropriate planning of perioperative care.  
54  
55  
56  
57  
58  
59  
60

1  
2  
3 Frailty status is an independent predictor of postoperative morbidity and mortality[2,3] and physical  
4 inactivity is a defining feature of frailty. Older adults spend a significant part of their day being  
5 sedentary[4] and do not meet current physical activity (PA) recommendations[5,6]. Increased PA can  
6 slow progression to a frail state[7] and there is growing evidence for the positive association between  
7 preoperative PA and perioperative outcomes[8]. Prehabilitation programmes incorporate  
8 optimisation of medical, nutritional and psychological status alongside prescribed exercise training  
9 programmes with specific goals of muscle strengthening and increased physical fitness, but are labour  
10 intensive and most have suboptimal participant adherence rates[9]. PA may also be an attractive  
11 prehabilitation target although it is currently not known whether improving PA is feasible or leads to  
12 improvements in outcome.  
13  
14  
15  
16  
17  
18  
19  
20  
21  
22  
23  
24  
25

26 Sustained changes in habitual, environmentally-cued health behaviours are notoriously difficult to  
27 achieve[10], but it is plausible that the preoperative period, due to the well-defined target end-point  
28 (surgery), may represent a unique teachable moment during which motivation to convert intention  
29 into action may be elevated, and a sustained change in behaviour may be more achievable than other  
30 settings. Thus, it may be possible to influence patient behaviours in order to reduce perioperative risk  
31 and improve outcomes.  
32  
33  
34  
35  
36  
37  
38  
39

40 Since the high-risk surgical group is likely to differ from the general population, normative PA data  
41 and patient acceptability data is lacking and this needs to be established before targeted intervention  
42 studies can be designed. To this end, it is critical to first have a robust, precise method of measuring  
43 PA and to understand PA related to daily routine in order to establish a baseline against which the  
44 impact of future interventions could be measured. Traditionally, in the perioperative setting, patients'  
45 PA levels have been evaluated using brief self-report questionnaires, however these are prone to error  
46 and recall bias[11]. The gold standard method of direct observation is labour-intensive and time-  
47 consuming, and therefore not feasible for widespread use[12]. Accelerometers could offer a potential  
48 solution; Tri-axial accelerometers detect magnitude and direction of acceleration and have been used  
49  
50  
51  
52  
53  
54  
55  
56  
57  
58  
59  
60

1  
2  
3 in large-scale epidemiological studies to provide a valid estimate of overall PA[13]. They are  
4 unobtrusive and non-invasive and can measure PA in free-living environments and may offer a means  
5 to assess the efficacy and therefore optimise interventions to improve PA. However, this first requires  
6 the specific population of interest to be characterised. Although wrist-worn accelerometry has been  
7 validated to measure PA in older patients[13], to our knowledge wearable accelerometers have not  
8 previously been used to characterise PA in a high-risk elderly population in the pre-operative period.  
9 Furthermore, the acceptability of PA measurement has not been established in these patients.

10 Through this pilot study we aimed to characterise PA levels in relation to daily routine across a variety  
11 of surgical specialties in order to obtain normative data to inform sample size calculations for future  
12 intervention studies. We also sought to assess whether there was a change in PA following current  
13 preoperative interventions (which form part of usual care in our centre) and quantify the variability of  
14 that change. We set out to quantify the correlation between objectively measured and self-reported  
15 PA in this patient group. Finally, as accelerometers have not previously been used in this setting, we  
16 aimed to assess how acceptable it is to use wrist-worn accelerometers to measure PA in high risk  
17 elderly patients in the preoperative period prior to rolling them out into a larger scale programme of  
18 research.

## 19 20 21 22 23 24 25 26 27 28 29 30 31 32 33 34 35 36 37 38 39 40 41 42 **METHODS**

### 43 44 45 **Study approvals and population**

46 This study was conducted at Cambridge University Hospitals National Health Service (NHS) Foundation  
47 Trust and approval by a Research Ethics Committee was obtained prior to participant recruitment  
48 (Research ethics number: 18/SC/0287). Written informed consent was obtained from all participants.  
49 All patients awaiting high-risk surgery are seen in a nurse-led preoperative assessment clinic  
50 (outpatient setting) as part of routine care, at which point they undergo frailty screening and may be  
51 referred to the 'Perioperative Review Informing Management of Elderly patients' (PRIME) clinic (a  
52  
53  
54  
55  
56  
57  
58  
59  
60



1  
2  
3 multidisciplinary clinic specifically designed to optimise frail elderly patients preoperatively). Inclusion  
4  
5 criteria for this study were patients referred to the PRIME clinic, participants must have had capacity  
6  
7 to consent and complete activity questionnaires and be willing and able to wear the accelerometer  
8  
9 around their wrist. PRIME clinic referral criteria were patients listed for major or complex surgery who  
10  
11 were aged  $\geq 65$  years and either had a Rockwood Clinical Frailty Scale[14] score (CFS) of  $\geq 4$  or had a  
12  
13 clinical picture that gave the pre-assessment nurse enough concern to refer for a multidisciplinary  
14  
15 preoperative assessment. Referral to, and attendance at the PRIME clinic formed part of usual  
16  
17 preoperative care at our institution. Participants were excluded from the study if they did not meet  
18  
19 the inclusion criteria, they refused to participate or their PRIME clinic appointment was scheduled  
20  
21  $< 72$  hours after referral for recruitment, as previous research has shown a minimum period of 72 hours  
22  
23 of continuous accelerometer wear-time is required to produce valid data[13]. Recruitment took place  
24  
25 between July and December 2018.  
26  
27  
28  
29  
30  
31  
32

### 33 **Patient and Public involvement**

34  
35 Patient and public involvement (PPI) was sought during the study design process with the aim of  
36  
37 ensuring that the research question was agreed to be important, the methods and running of the  
38  
39 study were likely to be acceptable to patients and the documents were written appropriately for the  
40  
41 target study population. Study documents including patient information leaflets, consent forms and  
42  
43 information posters were circulated to Cambridge University Hospital PPI panel for review. Feedback  
44  
45 from the PPI panel allowed us to construct more lay-friendly documents. The PPI panel considered the  
46  
47 burden of intervention and time required to participate in research. We will consider further PPI  
48  
49 involvement in order to disseminate the study results to those participants who requested to be  
50  
51 informed.  
52  
53  
54  
55  
56  
57

### 58 **Accelerometer and data collection**

1  
2  
3 Participants wore a waterproof triaxial accelerometer (Axivity AX3, Newcastle, UK[15]) which has been  
4 used in other studies of functionally impaired people[16]. The device was worn around the wrist for  
5 24 hours per day, for seven days prior to their PRIME clinic visit, and seven days immediately after  
6 their PRIME clinic visit. Participants wore the device around their preferred wrist for convenience and  
7 to maximise compliance. Participants were instructed by the research team how to re-fit the  
8 accelerometer should they remove it for any reason. Accelerometer devices were programmed to  
9 commence data collection on the same day that the device was fitted and to record for seven days.  
10 The accelerometer measures acceleration in three axes sampled at 100Hz with a dynamic range of +/-  
11 8g.  
12

13  
14 Raw accelerometry data were downloaded and visually inspected in order to detect any  
15 accelerometer technical issues, to ensure that the accelerometer was worn and recorded for the  
16 correct duration and had recorded the signals as expected. Data analyses were performed in R-  
17 package GGIR, the details of which have been previously described[17].  
18

19 PA related acceleration was calculated using auto-calibrated Euclidian norm minus one (ENMO)[18].  
20 The values presented are the average ENMO for all of the available data normalised per 24-hour cycle  
21 (diurnally balanced), with invalid data imputed using the average at similar time points on different  
22 days of the week. We chose to use ENMO as our measure of PA since previously published cut-offs for  
23 mild/moderate/vigorous intensity PA may not apply to this patient population.  
24

25  
26 The PRIME clinic visit involves a preoperative review by an anaesthetist, geriatrician, physiotherapist  
27 and occupational therapist. During this clinic visit, patients were provided with a behaviour change  
28 intervention as part of usual perioperative care at our institution (see behaviour change intervention  
29 below). At the PRIME clinic visit, a member of the research team retrieved the accelerometer worn by  
30 participants for the initial seven-day period and provided the participant with a new device for the  
31 second seven-day period. Participants completed two questionnaires at the PRIME clinic visit: a  
32  
33  
34  
35  
36  
37  
38  
39  
40  
41  
42  
43  
44  
45  
46  
47  
48  
49  
50  
51  
52  
53  
54  
55  
56  
57  
58  
59  
60

1  
2  
3 validated self-reported activity questionnaire; Physical Activity Scale for the Elderly (PASE)[19], and a  
4  
5 locally designed acceptability questionnaire (see assessment of acceptability below). Participants  
6  
7 were asked to repeat the PASE questionnaire at the end of the second seven-day wear period and  
8  
9 return the accelerometer and completed PASE questionnaire back to the study centre in a prepaid  
10  
11 envelope.  
12  
13

### 14 15 16 17 18 **Assessment of acceptability**

19  
20 Overall acceptability was assessed using a participant completed questionnaire utilising a visual  
21  
22 analogue scale (VAS) from 0-10, 0 being “very unacceptable” and 10 being “very acceptable”. We also  
23  
24 measured the length of time that the devices were worn in hours (wear time compliance).  
25  
26  
27  
28  
29

### 30 31 **Behaviour change intervention (PRIME clinic visit)**

32  
33 The behaviour change intervention (given as part of usual care) consisted of PA and exercise advice  
34  
35 described as follows according to the TiDieR checklist[20]. The goals of the intervention were to  
36  
37 improve PA levels on a day to day basis through activities of daily living (ADLs) or leisure activities, to  
38  
39 improve specific aspects of fitness, perioperative respiratory function and promote independence  
40  
41 with personal and domestic ADLs and leisure activities. Verbal and written advice was provided as  
42  
43 follows: two generic exercise leaflets (general exercises for the whole body, and walking exercises),  
44  
45 bespoke exercise programmes (generated using online Physiotoools[21] software) and local hospital-  
46  
47 specific respiratory exercise information leaflets were provided along with advice and information  
48  
49 about appropriate community services. The intervention was administered by an NHS Band seven  
50  
51 Physiotherapist with a background in Surgery and Elderly rehabilitation and an NHS Band seven  
52  
53 Occupational therapist with a background in Surgery, Orthopaedics and Elderly rehabilitation via one  
54  
55 face-to-face session (PRIME clinic visit) lasting 40 minutes. The information described above was given  
56  
57 to participants in the PRIME clinic room with the expectation that they would undertake the activities  
58  
59  
60

1  
2  
3 in their own homes. The intervention was tailored to each participant, depending upon presentation  
4 and planned surgical procedure. Advice given to participants was decided by experienced clinicians in  
5 the PRIME clinic and was based upon their clinical judgement following a comprehensive assessment.  
6  
7 Personalised exercise programmes were designed by the Physiotherapist during the clinic visit and  
8 taught to participants during this session, with a written information leaflet given to the participant  
9 to take home. Adherence to this intervention was not otherwise assessed.  
10  
11  
12  
13  
14  
15  
16  
17  
18  
19

### 20 **Statistical analysis**

21  
22 We generated descriptive statistics for the number of participants, wear time in hours, and average  
23 daily ENMO milli-gravitational units (mg). We analysed the difference in ENMO before and after the  
24 existing intervention using the Wilcoxon signed rank test. We also analysed ENMO stratified into  
25 orthopaedic and non-orthopaedic surgical populations.  
26  
27  
28  
29

30  
31 Since accelerometry and self-reported PA (measured using PASE) are continuous variable, we  
32 analysed correlation using the Pearson correlation coefficient.  
33  
34  
35

36  
37 Statistical analysis was conducted using the R statistical language[22]. Mixed effects models were  
38 constructed using the lme4 package[23], significance testing was done using analysis of deviance. A  
39 statistical significance level of 5% was assumed throughout and no correction for multiple  
40 comparisons were made.  
41  
42  
43  
44  
45  
46  
47  
48

### 49 **RESULTS**

50  
51  
52 36 patients were invited to take part in the study, of which 35 participants were recruited, 19 (54%)  
53 were female. 20 participants (57%) were listed for orthopaedic surgery, 7 (20%) gastrointestinal  
54 surgery, 5 (14%) urological surgery, and 1 each for vascular, gynaecology and breast surgery. The  
55 mean age was 79.9 years (SD = 5.6 years). Characteristics of the study population are given in Table 1.  
56  
57  
58  
59  
60

Our study was not powered to fully define the spectrum of comorbidities in this group. Instead, we summarised physical status in terms of the American Society of Anaesthesiologists physical status classification score (ASA score) which is widely used for perioperative risk assessment. Median nurse-assessed Rockwood Clinical Frailty Score (CFS) was 5 (IQR 4-5).

**Table 1.** Characteristics of the study population, Values are mean (SD), number (proportion).

| Characteristics of study sample, (n=35) | Value      |
|-----------------------------------------|------------|
| Age; years                              | 79.9 (5.6) |
| Sex,                                    |            |
| Female                                  | 19 (54%)   |
| Male                                    | 16 (46%)   |
| Rockwood Clinical Frailty Score,        |            |
| 3                                       | 1 (2.9%)   |
| 4                                       | 12 (34.3%) |
| 5                                       | 17 (48.6%) |
| 6                                       | 5 (14.3%)  |
| Surgical specialty,                     |            |
| Orthopaedic                             | 20 (57%)   |
| Gastrointestinal                        | 7 (20%)    |
| Urology                                 | 5 (14%)    |
| Gynaecology                             | 1 (3%)     |
| Vascular                                | 1 (3%)     |
| Breast                                  | 1 (3%)     |

|            |          |
|------------|----------|
| ASA score* |          |
| 2          | 8 (23%)  |
| 3          | 27 (77%) |

\*ASA; American Society of Anaesthesiologists physical status classification system score

Accelerometry data were available for analysis for 34 participants before the intervention and 30 participants after the intervention. Data from one pre-intervention participant were unavailable due to an accelerometer programming error, three participants were withdrawn from the post-intervention part of the study because their surgical procedure was scheduled to be <72hrs after the PRIME clinic visit thus participants would not have been able to wear the device for the minimum required time of 72 hours. One participant was withdrawn from the post-intervention part of the study due to skin irritation around the wrist strap (notably similar irritation was also caused by their own wristwatch), and one participant was withdrawn due to an area of bruising around the wrist strap. This participant was taking oral anticoagulants.

Preoperative baseline PA levels were obtained in 34 participants. The median baseline daily PA level was 14.3mg (IQR 9.75-22.04). There was no significant difference in baseline median PA between males [12.6mg (IQR 9.5-15.7)], and females [16.9mg (IQR 12.5-23.9)],  $p=0.18$ ). Median baseline daily PA in orthopaedic patients was 15.3mg (IQR 10.1-23.5), compared to a median of 12.7mg (IQR 9.2-16.6) in non-orthopaedic patients ( $p=0.271$ ) as shown in Figure 1. Baseline PA was higher in females than males in this orthopaedic sub-group (22.84mg vs 10.17mg,  $p=0.046$ ).

There was a significant increase in overall daily ENMO after the standard clinical intervention [median baseline ENMO 14.3mg (IQR 9.75-22.04), median ENMO post-intervention 20.91mg (IQR 14.83-

1  
2  
3 27.53),  $p=0.022$ ] as shown in Figure 1. There was no significant difference in ENMO before and after  
4 the intervention in patients awaiting orthopaedic surgery [median baseline ENMO 15.29mg (IQR  
5 10.07-23.5), median ENMO post-intervention 20.05mg (IQR 14.83-27.61),  $p=0.304$ ]. However, in  
6 those participants listed for non-orthopaedic surgery there was a significant increase in mean PA  
7 following the intervention [median baseline ENMO 12.71mg (IQR 9.20-16.61), median ENMO post-  
8 intervention 21.49mg (IQR 18.04-25.82),  $p=0.019$ ] Figure 1.  
9  
10  
11  
12  
13  
14  
15  
16  
17  
18  
19

20 The distribution of PA over time for all patients is shown in Figure 2 for both pre- and post-  
21 intervention. There was evidence for a linear increase (mixed effects model) in PA over time in the  
22 pre-intervention group  $+0.28$  mg/day, (95%CI: 0.011-0.53,  $p=0.04$ ) with a similar finding in the post  
23 intervention group  $+0.15$  mg/day (95% CI: -0.19-+0.50,  $p=0.37$ ), albeit not achieving statistical  
24 significance. There was no evidence for a significant effect of whether the day was a weekend or not,  
25 nor was there evidence for a non-linear time dependency.  
26  
27  
28  
29  
30  
31  
32  
33

34 There was no significant difference in self-reported PASE scores before and after the PRIME clinic  
35 intervention [median PASE pre-intervention was 67 (IQR 31-89.75), median PASE post-intervention  
36 was 65 (IQR 45.5-101)  $p=0.247$ ]. Furthermore, no significant statistical correlation was found between  
37 the accelerometer-measured PA and the self-reported PA measured using the PASE questionnaire,  
38 either before or after the intervention [Baseline  $\rho=0.162$  ( $p=0.4$ ), Post intervention  $\rho=-0.144$  ( $p=0.5$ )].  
39  
40  
41  
42  
43  
44  
45  
46  
47  
48

49 The median wear time of the wrist-worn accelerometer was 163.2 hours (IQR 150-167.5) pre-  
50 intervention and 166.1 hours (IQR 162.5-167) post-intervention. On average participants wore the  
51 accelerometers for 98% of the measurement period indicating excellent wear-time compliance, with  
52 values comparable to those achieved in other studies[13]. 33 participants completed the acceptability  
53 questionnaire, and the median overall acceptability score obtained was 10 (IQR 8-10). The high wear-  
54 time compliance, low voluntary withdrawal rate and high acceptability scores indicate overall  
55  
56  
57  
58  
59  
60

1  
2  
3 acceptability and feasibility of measuring PA in high risk elderly patients in the preoperative period  
4  
5 using these accelerometers.  
6  
7  
8  
9

## 10 **DISCUSSION**

11  
12  
13 These data demonstrate that wrist worn accelerometers can successfully be used to measure PA in  
14  
15 high-risk elderly patients in the preoperative period, and that this process was acceptable to  
16  
17 participants. The fact that there was no statistical correlation between participant-reported PASE and  
18  
19 accelerometer-measured PA highlights the need for more objective measures of PA[24] and suggests  
20  
21 a role for such devices in perioperative research and perhaps clinical care.  
22  
23  
24  
25

26  
27 We demonstrated a substantial variability in baseline PA in the frail elderly preoperative  
28  
29 population. Our study also gives an estimate of the typical mean daily PA levels in this specific group  
30  
31 of patients which has not previously been described. Such data should inform the planning of potential  
32  
33 studies involving PA measurements in this setting. We found low PA levels in this population: We do  
34  
35 not have access to a 'control' group as such a group would be difficult to define. However, by way of  
36  
37 comparison, the UK Biobank study reported mean daily ENMO values in over three thousand 75-79  
38  
39 year olds (the most comparable group to ours) women of 23.9mg (SD=6.5) and in men this was 22.9mg  
40  
41 (SD=6.8)[13]. Our study population had lower baseline mean daily ENMO of 18.9mg (SD=10.5) in  
42  
43 women, and 13.71mg (SD=6.1) in men, which may reflect their underlying medical conditions, frailty  
44  
45 and increased age (mean age of our study population was 79.9 years SD 5.6).  
46  
47  
48  
49

50  
51 ENMO may not be as intuitive as post-processed PA intensity metrics such as step count or time spent  
52  
53 in various intensities of PA. However, such metrics may not generalise outside the population in which  
54  
55 they were developed[25]. Furthermore, we wanted to avoid using any potentially proprietary  
56  
57 algorithms. Using unprocessed ENMO avoids both of these problems as it is the fundamental physical  
58  
59  
60



1  
2  
3 quantity measured by all accelerometers and should therefore be agnostic to patient-group. Further  
4  
5 work is be needed to develop metabolically meaningful PA intensity cut points in this patient group,  
6  
7 but we suggest from our work that ENMO summary data is a useful surrogate even without this.  
8  
9

10  
11  
12 In the non-orthopaedic subgroup, we found a significant increase in PA following the PRIME clinic  
13  
14 intervention, even though this was not optimised. Mixed effects modelling did not show any decrease  
15  
16 in PA over time in either the pre- or post-intervention group suggesting that PA levels were sustained  
17  
18 at least for the duration of the measurement period. Because we had no control on which day of the  
19  
20 week participants would be recruited from clinic, we also looked at whether activity might be different  
21  
22 on weekend days, but this did not seem to be the case in this population. The PA levels in some  
23  
24 patients post-intervention resembled more closely the baseline levels reported in the Biobank study.  
25  
26 The fact that physical activity levels increased to this extent following the unoptimised intervention is  
27  
28 a remarkable and somewhat unexpected finding as health behaviour change is notoriously difficult to  
29  
30 achieve[10]. Our findings provide some evidence to suggest that the preoperative setting may indeed  
31  
32 represent a unique period during which behavioural interventions are more likely to result in  
33  
34 improvements in PA, perhaps due to the well-defined endpoint (surgical procedure) and the  
35  
36 motivation that physical activity may impact perioperative outcome. It seems reasonable to suggest  
37  
38 that a well-designed complex intervention could result in greater changes in PA.  
39  
40  
41  
42  
43  
44

45  
46 The lack of significant improvement in PA in those participants awaiting orthopaedic surgery may  
47  
48 indicate a restriction of PA in this population, in which mobility is likely to be limited due to underlying  
49  
50 orthopaedic problems (all orthopaedic participants were awaiting major lower limb joint  
51  
52 replacements). The potential to increase preoperative PA in the orthopaedic population may be  
53  
54 limited; waiting lists for joint replacement surgery in the UK are long, and such patients may have  
55  
56 already been in the hospital system prior to the PRIME clinic visit (intervention). This potentially  
57  
58 restricted PA, and prior engagement with hospital services may mean that these patients may have  
59  
60

1  
2  
3 already received PA advice from their surgical and primary care teams prior to referral to the PRIME  
4 clinic and may have already reached their prehabilitation limit. Nevertheless, although PA in this  
5 subgroup group did not change following the existing unoptimized intervention, there is perhaps still  
6 scope for a better intervention, and wearable accelerometers may assist in determining what this may  
7 be. Our finding provides support for the idea that a complex intervention would need to be tailored  
8 to this population.  
9  
10  
11  
12  
13  
14  
15  
16  
17  
18

19 We asked participants to wear the accelerometers around their wrist. Traditionally the hip has been  
20 the most widely used site for placement of the accelerometer as this was believed to best represent  
21 total body movement[26]. However, wear-time compliance has been a problem with hip-worn devices  
22 which limits the validity of the data analysis[27]. Cui et al[28] fixed an accelerometer to participants'  
23 chests using an adhesive plaster, however one quarter of participants did not wear the device for 72  
24 hours which may limit the validity of data. We opted for a wrist worn device to circumvent this issue,  
25 and asked participants to wear the device continuously (day and night) for a seven-day period to  
26 simplify proceedings. We also felt that this placement would capture PA associated with activities of  
27 daily living, likely to form a significant proportion of PA amongst a high-risk elderly population. Whilst  
28 previous studies have utilised the non-dominant wrist[13], for this pilot study we allowed a pragmatic  
29 approach to allow participants to select their preferred wrist in order to maximise compliance and  
30 total wear time. Furthermore, previous work has shown no difference in PA measurements when  
31 measured simultaneously on the dominant and non-dominant wrist[29]. We accept that in a frail  
32 elderly population, many of whom use walking aids, a wrist-worn device must be used with caution  
33 and further work is warranted to evaluate the transferability of data from different sites.  
34  
35  
36  
37  
38  
39  
40  
41  
42  
43  
44  
45  
46  
47  
48  
49  
50  
51  
52  
53

54 Limitations of this study include the small sample size. Within this small sample we were non-selective  
55 regarding recruitment of participants from various surgical specialties. As such, we were unable to  
56 further analyse data from subgroups other than orthopaedics versus non-orthopaedics. This is an area  
57  
58  
59  
60

1  
2  
3 of potential future research incorporating larger patient numbers in various subspecialties. One  
4  
5 further limitation was that we did not attempt to relate ENMO measurements to specific activities of  
6  
7 daily living. This will be an important subsequent study but was outside the scope of this work as it  
8  
9 might have reduced tolerability.  
10

11  
12  
13  
14 Whilst we have demonstrated that patients' behaviour can change in the preoperative period, we do  
15  
16 not know how this translates clinically, and indeed what degree (if any) of change in PA might lead to  
17  
18 a change in the outcomes that are important to patients. However, it is reasonable to propose that  
19  
20 such a relationship might exist, and further work is needed to investigate whether increasing PA levels  
21  
22 in the preoperative period has any impact on perioperative outcome, and if so, whether the response  
23  
24 is dose- or timing-dependent. Furthermore, if an association between preoperative PA and  
25  
26 perioperative outcome is discovered, it is important to determine the minimum duration of increased  
27  
28 PA levels required to influence patient outcome, and whether this would be feasible in the  
29  
30 preoperative period. If optimum PA level targets can be determined it would then be important to  
31  
32 find out whether it is actually possible to meet PA 'targets' in the high-risk elderly population by use  
33  
34 of preoperative interventions. Further research into the optimum prehabilitation programme for frail  
35  
36 elderly patients in various patient cohorts is also required. Whilst we have demonstrated that the  
37  
38 increase in PA after the intervention was sustained throughout the seven-day measurement period,  
39  
40 we do not know whether the increase in PA is sustained beyond this period. Further work is required  
41  
42 to elucidate this.  
43  
44  
45  
46  
47  
48  
49

## 50 **CONCLUSION**

51  
52 Using wrist-worn accelerometers to characterise daily typical activity levels and assess the impact of  
53  
54 an existing clinical intervention was feasible and acceptable in this patient population. An increase in  
55  
56 PA levels was measured following an unoptimized, and this increase in PA was sustained for at least a  
57  
58 week suggesting that the preoperative period may be a teachable moment in which health behaviour  
59  
60

1  
2  
3 change interventions may be successful. Patient reported PA did not correlate with our objective  
4  
5 measurements. Accelerometers may therefore be a useful tool to design and validate interventions  
6  
7 for improving PA in this setting.  
8  
9

## 10 11 12 **ACKNOWLEDGEMENTS**

13  
14  
15 This study was registered with ClinicalTrials.gov (NCT03737903) on 01/07/18. The authors would like  
16  
17 to acknowledge the help of the Nursing staff of the Preoperative Assessment Clinic at Cambridge  
18  
19 University Hospitals NHS Foundation Trust, Dr Christopher Hall and Dr Mark Vivian for their assistance  
20  
21 with participant recruitment, and Ms Amanda Saunders and Ms Sarah Lester for assistance with  
22  
23 retrieval and distribution of accelerometers in the PRIME clinic visit.  
24  
25  
26  
27  
28  
29

## 30 31 32 **COMPETING INTERESTS AND FUNDING**

33 This research received no specific grant from any funding agency in the public, commercial or non-for-  
34  
35 profit sectors. No competing interests declared.  
36  
37  
38  
39

## 40 41 42 **DATA SHARING**

43 The authors are happy to consider requests for sharing fully anonymised data for specific research  
44  
45 proposals on a collaborative basis.  
46  
47  
48  
49  
50

## 51 52 53 **AUTHOR CONTRIBUTORS**

54 LG, AE and SG contributed to the conception and design of the study, LG and AE wrote the protocol,  
55  
56 LG and JO contributed to data collection. LG and AE were responsible for data analysis. LG and AE  
57  
58  
59  
60

1  
2  
3 prepared the manuscript and all authors contributed to the review and revision of the manuscript and  
4  
5 provided final approval of the version to be published.  
6  
7  
8  
9  
10  
11  
12  
13  
14  
15  
16  
17  
18  
19  
20  
21  
22  
23  
24  
25  
26  
27  
28  
29  
30  
31  
32  
33  
34  
35  
36  
37  
38  
39  
40  
41  
42  
43  
44  
45  
46  
47  
48  
49  
50  
51  
52  
53  
54  
55  
56  
57  
58  
59  
60

For peer review only

## REFERENCES

- 1 Pearse RM, Harrison DA, James P, *et al.* Identification and characterisation of the high-risk surgical population in the United Kingdom. *Crit Care* 2006;10 doi:10.1186/cc4928
- 2 Makary MA, Segev DL, Pronovost PJ, *et al.* Frailty as a Predictor of Surgical Outcomes in Older Patients. *J Am Coll Surg* 2010;210:901–8.doi:10.1016/j.jamcollsurg.2010.01.028
- 3 Louwers L, Schnickel G, Rubinfeld I. Use of a simplified frailty index to predict Clavien 4 complications and mortality after hepatectomy: analysis of the National Surgical Quality Improvement Project database. *Am J Surg* 2016;211:1071–6.doi:10.1016/j.amjsurg.2015.09.015
- 4 Harvey JA, Chastin SFM, Skelton DA. Prevalence of sedentary behavior in older adults: A systematic review. *Int J Environ Res Public Health* 2013;10:6645–61.doi:10.3390/ijerph10126645
- 5 Taylor D. Physical activity is medicine for older adults. *Postgrad Med J.* 2014Jan;90(1059)26–32.doi:10.1136/postgradmedj-2012-131366
- 6 British Heart Foundation. Physical inactivity across the Four Nations. *Phys Inact Sedentary Behav Rep 2017* 2017.
- 7 Rogers NT, Marshall A, Roberts CH, *et al.* Physical activity and trajectories of frailty among older adults: Evidence from the English Longitudinal Study of Ageing. *PLoS One.* 2017Feb2;12(2). doi:10.1371/journal.pone.0170878
- 8 Nilsson H, Angerås U, Bock D, *et al.* Is preoperative physical activity related to post-surgery recovery? A cohort study of patients with breast cancer. *BMJ Open* 2016;6:e007997. doi:10.1136/bmjopen-2015-007997
- 9 Picorelli AMA, Pereira LSM, Pereira DS, *et al.* Adherence to exercise programs for older

- 1  
2  
3 people is influenced by program characteristics and personal factors: a systematic review. *J*  
4  
5 *Physiother* 2014;60:151–6. doi:10.1016/J.JPHYS.2014.06.012  
6  
7  
8  
9 10 Middleton KR, Anton SD, Perri MG. Long-Term Adherence to Health Behavior Change HHS  
10 Public Access. *Am J Lifestyle Med* 2013;7:395–404. doi:10.1177/1559827613488867  
11  
12  
13 11 Bond DS, Jakicic JM, Unick JL, *et al.* Pre- to postoperative physical activity changes in bariatric  
14 surgery patients: self report vs. objective measures. *Obesity (Silver Spring)* 2010;18:2395–7.  
15  
16 doi:10.1038/oby.2010.88  
17  
18  
19  
20 12 Vanhees L, Lefevre J, Philippaerts R, *et al.* How to assess physical activity? How to assess  
21 physical fitness? *Eur J Cardiovasc Prev Rehabil.* 2005Apr;12(2):102-  
22  
23 14.doi:10.1097/01.hjr.0000161551.73095.9c  
24  
25  
26  
27  
28 13 Doherty A, Jackson D, Hammerla N, *et al.* Large scale population assessment of physical  
29 activity using wrist worn accelerometers: The UK biobank study. *PLoS One* 2017;12:1–14.  
30  
31 doi:10.1371/journal.pone.0169649  
32  
33  
34  
35 14 Rockwood K, Song X, MacKnight C, *et al.* A global clinical measure of fitness and frailty in  
36 elderly people. *Can Med Assoc J* 2005;173:489–95. doi:10.1503/cmaj.050051  
37  
38  
39  
40 15 Axivity. AX3\_Data\_Sheet (1).  
41  
42 2015.https://axivity.com/files/resources/AX3\_Data\_Sheet.pdf(accessed 12/06/2019)  
43  
44  
45  
46 16 Clarke CL, Taylor J, Crighton LJ, *et al.* Validation of the AX3 triaxial accelerometer in older  
47 functionally impaired people. *Aging Clin Exp Res*;29. doi:10.1007/s40520-016-0604-8  
48  
49  
50  
51 17 Van Hees VT, Fang Z, Zhao JH, *et al.* GGIR: Raw Accelerometer Data Analysis. *R Packag version*  
52  
53 18-1 Published Online First: 2019. doi:10.5281/zenodo.1051064  
54  
55  
56 18 Van Hees VT, Fang Z, Langford J, *et al.* Autocalibration of accelerometer data for free-living  
57 physical activity assessment using local gravity and temperature: an evaluation on four  
58  
59  
60

- 1  
2  
3 continents. *J Appl Physiol* 2014;117:738–44. doi:10.1152/jappphysiol.00421.2014  
4  
5  
6 19 Washburn R, Smith K. The physical activity scale for the elderly (PASE): development and  
7  
8 evaluation. *J Clin Epidemiol* 1993;46:153–62. doi:10.1016/0895-4356(93)90053-4  
9  
10  
11 20 Hoffmann TC, Glasziou PP, Boutron I, *et al*. Better reporting of interventions: template for  
12  
13 intervention description and replication (TIDieR) checklist and guide. *BMJ* 2014;348:g1687.  
14  
15 doi:10.1136/bmj.g1687  
16  
17  
18 21 PhysioTools Key Features | Physiotoools. [https://www.physiotools.com/physiotools-key-](https://www.physiotools.com/physiotools-key-features)  
19  
20 features (accessed 24 Feb 2019).  
21  
22  
23 22 Team RC. R: A language and environment for statistical computing. 2017. [https://www.R-](https://www.R-project.org/)  
24  
25 project.org/ (accessed 12/06/19)  
26  
27  
28 23 Bates D, Mächler M, Bolker B, *et al*. Fitting Linear Mixed-Effects Models Using lme4. *J Stat*  
29  
30 *Softw* 2015;67:1–48. doi:10.18637/jss.v067.i01  
31  
32  
33 24 Wareham NJ, Rennie KL. The assessment of physical activity in individuals and populations:  
34  
35 why try to be more precise about how physical activity is assessed? *Int J Obes Relat Metab*  
36  
37 *Disord* 1998;22 Suppl 2:S30-8.  
38  
39  
40  
41 25 Schrack JA, Cooper R, Koster A, *et al*. Assessing Daily Physical Activity in Older Adults:  
42  
43 Unraveling the Complexity of Monitors, Measures, and Methods. *J Gerontol A Biol Sci Med Sci*  
44  
45 2016;71:1039–48. doi:10.1093/gerona/glw026  
46  
47  
48 26 Cleland I, Kikhia B, Nugent C, *et al*. Optimal placement of accelerometers for the detection of  
49  
50 everyday activities. *Sensors (Basel)* 2013;13:9183–200. doi:10.3390/s130709183  
51  
52  
53 27 Troiano RP, McClain JJ, Brychta RJ, *et al*. Evolution of accelerometer methods for physical  
54  
55 activity research. *Br J Sports Med*. 2014Jul;48(13):1019-23. doi:10.1136/bjsports-2014-  
56  
57 093546  
58  
59  
60



- 1  
2  
3 28 Cui HW, Kirby GS, Surmacz K, *et al.* The association of pre-operative home accelerometry  
4 with cardiopulmonary exercise variables. *Anaesthesia* Published Online First: 2017.  
5  
6  
7 doi:10.1111/anae.14181  
8  
9  
10 29 Dieu O, Mikulovic J, Fardy PS, *et al.* Physical activity using wrist-worn accelerometers:  
11 comparison of dominant and non-dominant wrist. *Clin Physiol Funct Imaging* 2017;37:525–9.  
12  
13  
14  
15 doi:10.1111/cpf.12337  
16  
17  
18  
19  
20  
21  
22  
23

## LEGENDS

24  
25  
26  
27 **Figure 1.** Notched Box Plots representing physical activity (ENMO, milli-gravitational units mg) before  
28 (blue) and after (red) the PRIME clinic intervention in all participants (left), participants listed for  
29 orthopaedic surgery (middle) and non-orthopaedic surgery (right). Open circle (o) represents outliers.  
30  
31  
32  
33  
34  
35  
36  
37  
38  
39  
40  
41  
42  
43  
44  
45  
46  
47  
48  
49  
50  
51  
52  
53  
54  
55  
56  
57  
58  
59  
60  
The notch represents the 95% confidence interval of the Median; 95% Confidence that the medians differ if two boxes' notches do not overlap. Significant differences between 'before-', and 'after-' intervention groups are indicated with an asterisk (\*)

**Figure 2.** Physical activity (ENMO) against time before (left panel) and after (right panel) the intervention for each patient. The dots / blue lines represent the mean across the patient group with +/- 1 s.d. shaded. Only complete (2-6) days included. Mean physical activity is increased after the intervention with no discernible decline in activity over time.

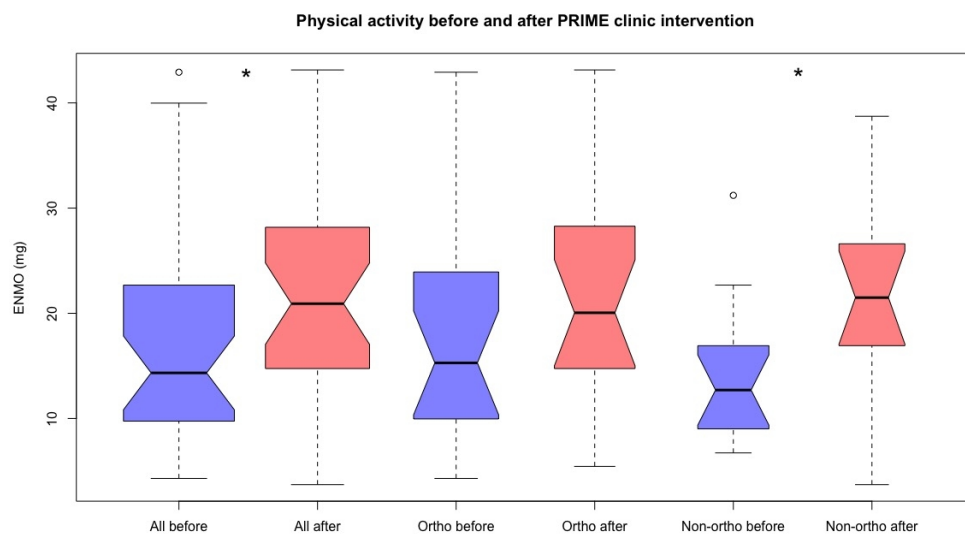

Figure 1. Notched Box Plots representing physical activity (ENMO, milli-gravitational units mg) before (blue) and after (red) the PRIME clinic intervention in all participants (left), participants listed for orthopaedic surgery (middle) and non-orthopaedic surgery (right). Open circle (o) represents outliers. The notch represents the 95% confidence interval of the Median; 95% Confidence that the medians differ if two boxes' notches do not overlap. Significant differences between 'before-', and 'after-' intervention groups are indicated with an asterisk (\*)

412x246mm (72 x 72 DPI)

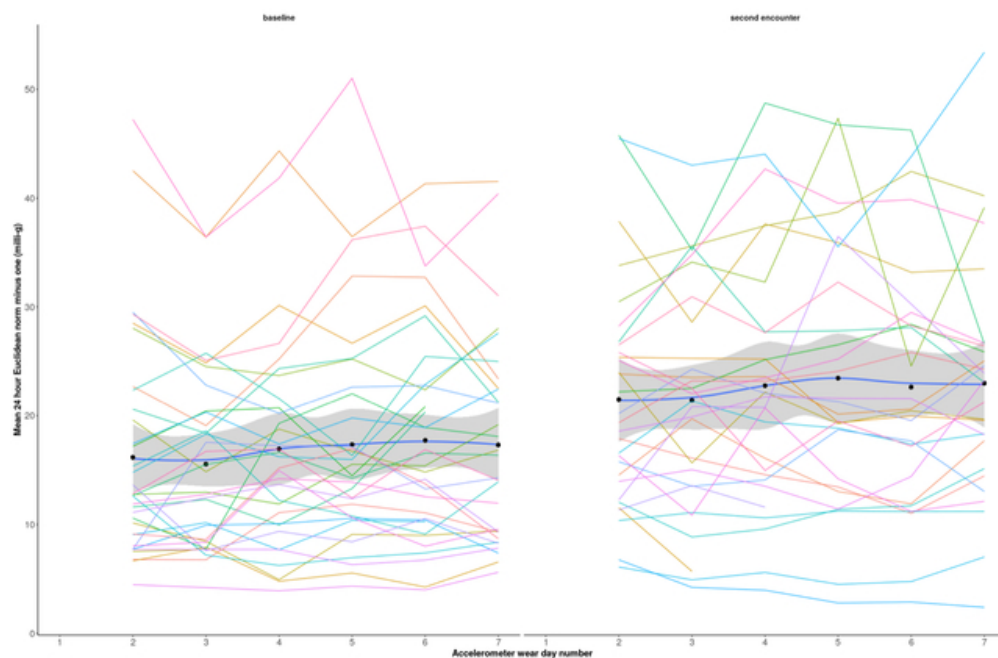

Figure 2. Physical activity (ENMO) against time before (left panel) and after (right panel) the intervention for each patient. The dots / blue lines represent the mean across the patient group with  $\pm 1$  s.d. shaded. Only complete (2-6) days included. Mean physical activity is increased after the intervention with no discernible decline in activity over time

54x35mm (300 x 300 DPI)
